# Supplementary material
Source: ML conference proceedings conference paper supplement (https://openreview.net/forum?id=6tjGOF0wxQ)
Supplement: supplementary_material [file liu25.docx]

I believe we don’t need to upload the copyright form or bibtex for the non-archival version.
